# Supplementary material
Source: publisher site journal article supplement (https://www.spandidos-publications.com/2082/downloadSupplementary)

Figure S1. Antiproliferative effect of the empty micellar solution consisting of Pluronic®P-123 on HuT-78 cells after 24, 48 and 72 h of treatment.

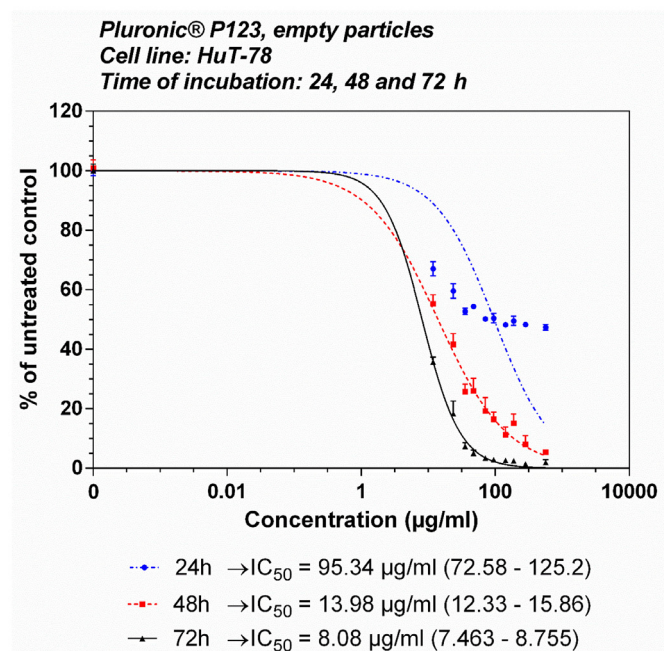

Figure S2. Antiproliferative effect of the empty micellar solution consisting of Pluronic®P-123 and Pluronic®F-127 (1:1, v/v) on HuT-78, HH and MJ cells, after 72 h of treatment.

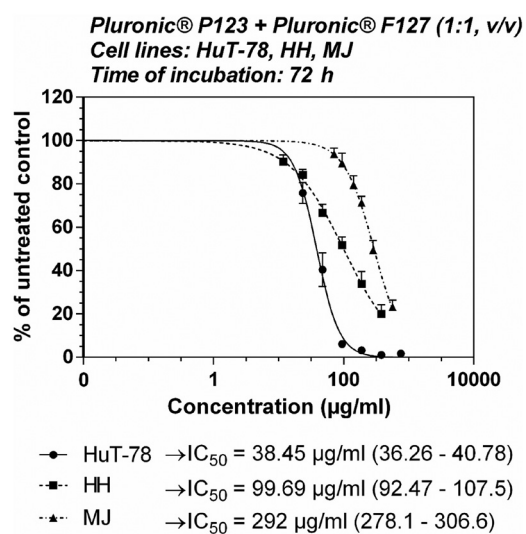

Supplement: Supplementary file 1 [file downloadSupplementary]
